# Supplementary material for: Positive coactivator PC4 shows dynamic nucleolar distribution required for rDNA transcription and protein synthesis
Source: Research Square preprint supplement (doi:10.21203/rs.3.rs-6077105/v1), 2025-04-23

# **Acetylation Drives Nonhistone Chromatin Protein PC4-mediated Nucleolar Organization and Function**

Stephanie Kaypee<sup>1,4</sup>, Kyoko Ochiai<sup>1</sup>, Hiroki Shima<sup>1</sup>, Mitsuyo Matsumoto<sup>1</sup>, Mahabub Alam<sup>1,5</sup>, Tsuyoshi Ikura<sup>2</sup>, Tapas K. Kundu<sup>1,3\*</sup>, Kazuhiko Igarashi<sup>1\*</sup>

<sup>1</sup> Department of Biochemistry, Tohoku University Graduate School of Medicine, Seiryomachi 2-1, Sendai 980-8575, Japan

<sup>2</sup> Laboratory of Chromatin Regulatory Network, Department of Genome Biology, Radiation Biology Center, Graduate School of Biostudies, Kyoto University, Yoshida Konoe-cho, Sakyo-ku, Kyoto, Japan.

<sup>3</sup> Transcription and Disease Laboratory, Molecular Biology and Genetics Unit, Jawaharlal Nehru Centre for Advanced Scientific Research, Bangalore-560064, India

\*Corresponding author, igarashi@med.tohoku.ac.jp (KI) or tapas@jncasr.ac.in (TKK)

Current address:

<sup>4</sup> Ubiquitin Biology Laboratory, Graduate School of Frontier Biosciences, Osaka University, 1-3 Yamadaoka, Suita, Osaka 565-0871, Japan

<sup>5</sup> Department of Animal Science and Nutrition, Chattogram Veterinary and Animal Sciences University, Khulshi, Chattogram-4225, Bangladesh

**Supplemental Information**

Table S1

| Name                         | Forward primer (5'-3')                                                  | Reverse primer (5'-3')                                                 | Purpose            |
|------------------------------|-------------------------------------------------------------------------|------------------------------------------------------------------------|--------------------|
| EGFP-N1-PC4<br>K26A-<br>R27A | GAAAAAAGTTAGCGGCGAA<br>A<br>AAGCAAGCG                                   | CGCTTGCTTTTTTCGCCGCTA<br>ACTTTTTTTC                                    | Cloning<br>Primers |
| EGFP-N1-PC4<br>K23A-<br>K24A | CAGTGATTCGGACAGCGAAG<br>T<br>TGAAGCAGCGTTAAAGAGGA<br>A<br>AAAGCAAGCGGTT | AACCGCTTGCTTTTTCTCT<br>T<br>TAACGCTGCTTCAACTTCGC<br>T<br>GTCCGAATCACTG | Cloning<br>Primers |
| EGFP-N1-PC4<br>K35R          | AAGCAAGCGTTCCAGAGA<br>G<br>GCCCGTGAAG                                   | CTTCACGGGCCTCTCTGGA<br>A<br>CCGCTTGCTT                                 | Cloning<br>Primers |
| mouse<br>actin               | CGTTGACATCCGTAAAGACC<br>TC                                              | AGCCACCGATCCACACAGA                                                    | RT-<br>qPCR        |
| mouse<br>47S                 | GCTGTTTTGCTTGTCCAGCC                                                    | CTCTCCGGAATCGAACCCCT<br>GA                                             | RT-<br>qPCR        |
| human<br>actin               | ATTTGCGGTGGACGATGGAG                                                    | AGAGATGGCCACGGCTGCT<br>T                                               | RT-<br>qPCR        |
| human<br>47S                 | TGTCAGGCGTTCTCGTCTC                                                     | AGCACGACGTCACCACATC                                                    | RT-<br>qPCR        |
| Promote<br>r                 | GGTATATCTTTCGCTCCGAG                                                    | AGCGACAGGTCGCCAGAG<br>GA                                               | ChIP-<br>qPCR      |
| 18S                          | CGACGACCCATTCGAACGTC<br>T                                               | CTCTCCGGAATCGAACCCCT<br>GA                                             | ChIP-<br>qPCR      |
| 5.8S                         | AGTCGGGTTGCTTGGGAATG<br>C                                               | CCCTTACGGTACTTGTGAC<br>T                                               | ChIP-<br>qPCR      |

|     |                           |                           |               |
|-----|---------------------------|---------------------------|---------------|
| 28S | GAGCTCAGGGAGGACAGAA<br>A  | AGGTCAGAAGGATCGTGAG<br>G  | ChIP-<br>qPCR |
| IGS | GTTGACGTACAGGGTGGACT<br>G | GGAAGTTGTCTTCACGCCT<br>GA | ChIP-<br>qPCR |

Table S1: List of primers used in this study.

Table S2:

|    | <b>Nucleolar proteins interacting with PC4</b> | <b>Nucleolar localization</b> | <b>Function</b>                          |
|----|------------------------------------------------|-------------------------------|------------------------------------------|
| 1  | Tcof1                                          | FC                            | RNA polymerase I transcription           |
| 2  | Smarca5                                        | FC                            |                                          |
| 3  | Supt16h                                        | FC                            |                                          |
| 4  | Mybbp1a                                        | Nucleoli                      |                                          |
| 5  | Top1                                           | FC                            | rDNA topology, rDNA transcription        |
| 6  | Top2a                                          | Nucleoli                      |                                          |
| 7  | Fbl                                            | FC, DFC                       | rRNA processing                          |
| 8  | Nop56                                          | FC                            |                                          |
| 9  | Nop58                                          | FC, Nucleoli                  |                                          |
| 10 | Ftsj3                                          | Nucleoli rim, Nucleoli        |                                          |
| 11 | Rrp5                                           | Nucleoli rim                  |                                          |
| 12 | Hmgb2                                          | Nucleoli                      | Chromatin organization                   |
| 13 | Lbr                                            | Nucleoli rim                  |                                          |
| 14 | Ddx21                                          | Nucleoli rim, Nucleoli        | rDNA transcription, rRNA processing      |
| 15 | Ddx5                                           | Nucleoli                      |                                          |
| 16 | Ddx18                                          | Nucleoli rim, Nucleoli        | rRNA processing, ribosome biogenesis     |
| 17 | Npm1                                           | Nucleoli rim, Nucleoli        |                                          |
| 18 | Ncl                                            | Nucleoli rim, Nucleoli        |                                          |
| 19 | Rpl13                                          | Nucleoli                      | Nucleolar structure, ribosome biogenesis |
| 20 | Rpl13a                                         | Nucleoli                      |                                          |
| 21 | Rpl4                                           | Nucleoli                      |                                          |
| 22 | Rpl40                                          | Nucleoli                      |                                          |
| 23 | Rpl7                                           | Nucleoli                      |                                          |
| 24 | Rpl7a                                          | Nucleoli                      |                                          |
| 25 | Rpl18a                                         | Nucleoli                      |                                          |
| 26 | Rpl26                                          | Nucleoli                      |                                          |

|    |        |                        |                                         |
|----|--------|------------------------|-----------------------------------------|
| 27 | Rpl27  | Nucleoli               |                                         |
| 28 | Rpl22  | Nucleoli               |                                         |
| 29 | Rpl5   | Nucleoli rim, Nucleoli |                                         |
| 30 | Rps6   | Nucleoli               | Ribosome biogenesis                     |
| 31 | Rps25  | Nucleoli               |                                         |
| 32 | Rps27a | Nucleoli               |                                         |
| 33 | Ddx18  | Nucleoli rim, Nucleoli | rRNA processing,<br>nucleolar structure |
| 34 | Ddx56  | Nucleoli               |                                         |
| 35 | Nono   | FC, Nucleoli           | DNA damage response at<br>rDNA          |

Table S2: List of nucleolar proteins interacting with PC4.

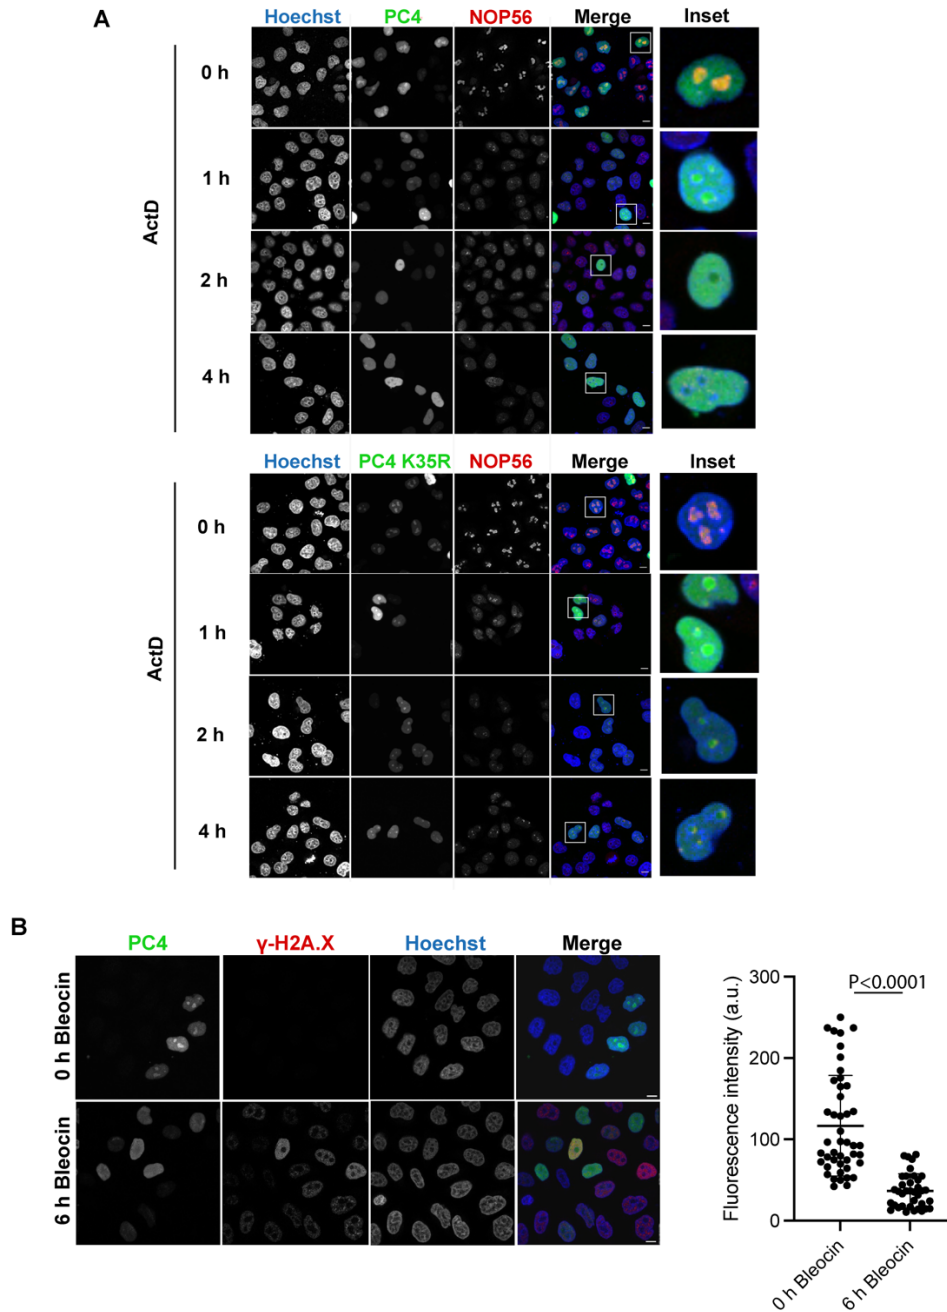

**Figure S1. Time-dependent dynamics of PC4 and NOP56 under ActD treatment. A.** Sub-cellular localization of WT PC4 (green) and NOP65 (red) under ActD treatment of 0, 1, 2, and 4 hours (h) duration. N=1. **B.** PC4-GFP (green) and  $\gamma$ -H2A (red) localization upon 5  $\mu$ M Bleocin treatment for 6 h. Nucleolar fluorescence intensities were plotted in the graph alongside. DMSO control, n=45, Bleocin, n=37. Unpaired t-test was performed. N=3. Scale bar = 10  $\mu$ m.

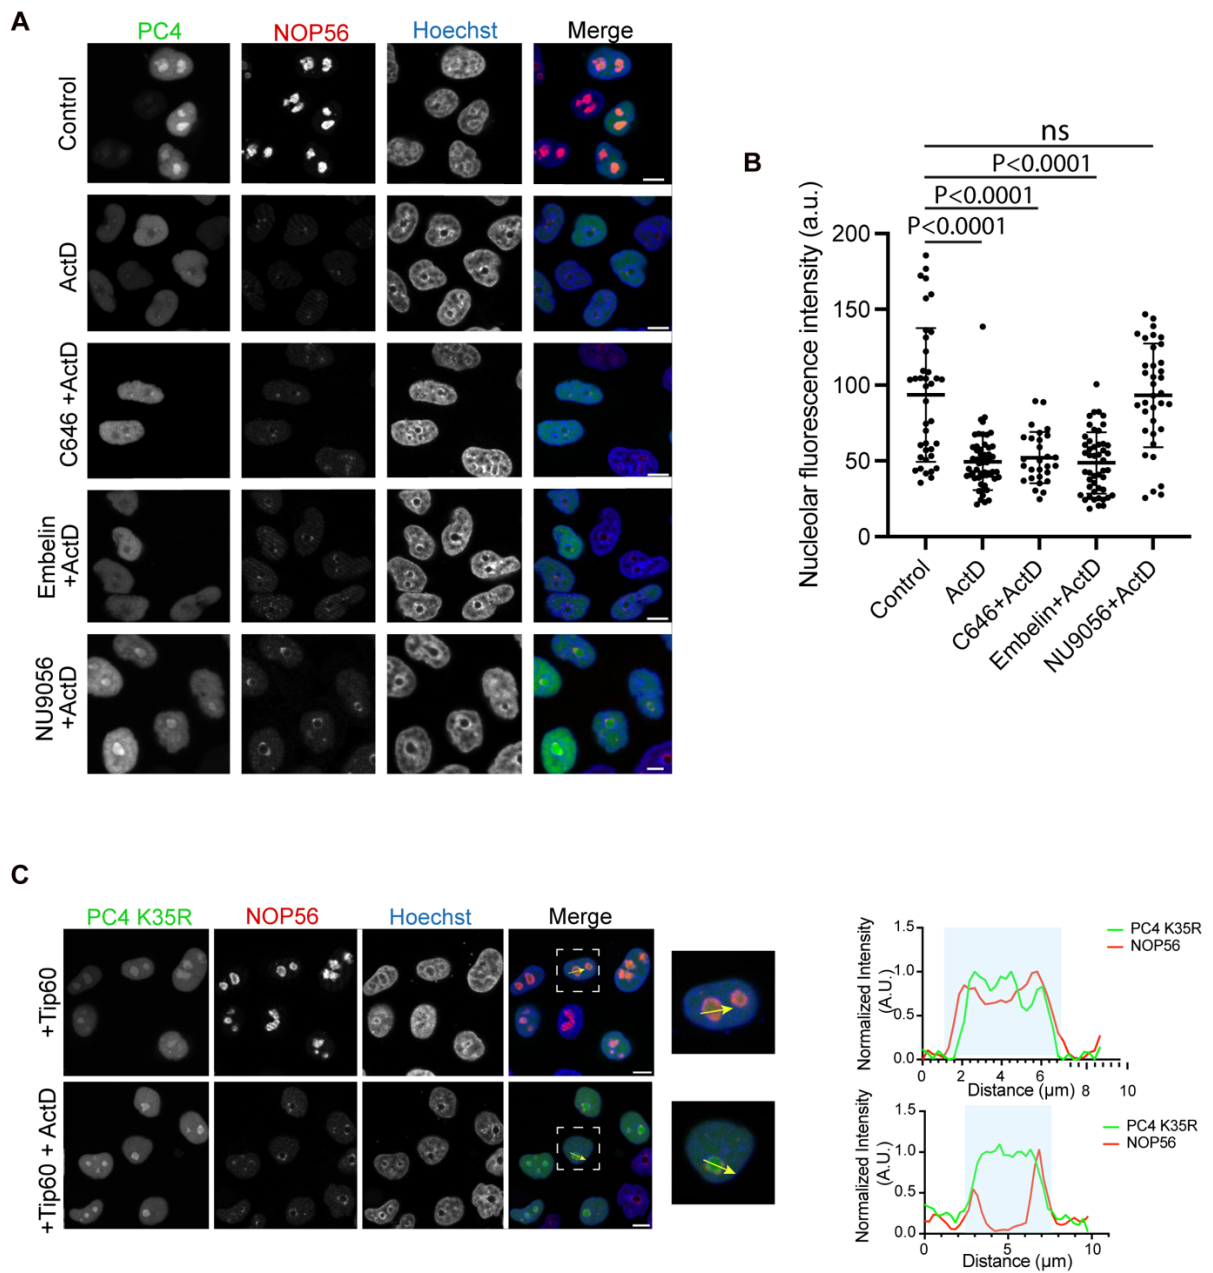

**Figure S2. Tip60-mediated acetylation of PC4 on K35R determines its subnuclear localization.** A. Subcellular localization of PC4 (green) and Nop56 (red) in HeLa cells treated with 10  $\mu$ M C646 for 2h, 20  $\mu$ M Embelin for 24 h, or 10  $\mu$ M NU9056 for 6 h in addition to ActD treatment. Nuclei were counterstained with Hoechst (blue). B. Graphical representation of the nucleolar intensities of control cells (n=39 nucleoli in 22 cells) or cells treated with ActD (n=55 nucleoli in 31 cells), C646+ ActD (n=28 in 20 cells), Embelin+ActD (n=48 nucleoli in 33 cells), or ActD+NU9056 (n=36 nucleoli in 26 cells).

N=2. PC4 K35R (green) and Nop56 (red) subnuclear localization in cells overexpressing Tip60 with or without ActD. Nuclei was counterstained with Hoechst (blue). Line plots across the yellow arrows were plotted to show the colocalization between PC4 and Nop56 nucleolar protein. The nucleolar regions are shaded in blue. N=1. Scale bar = 10  $\mu$ m.



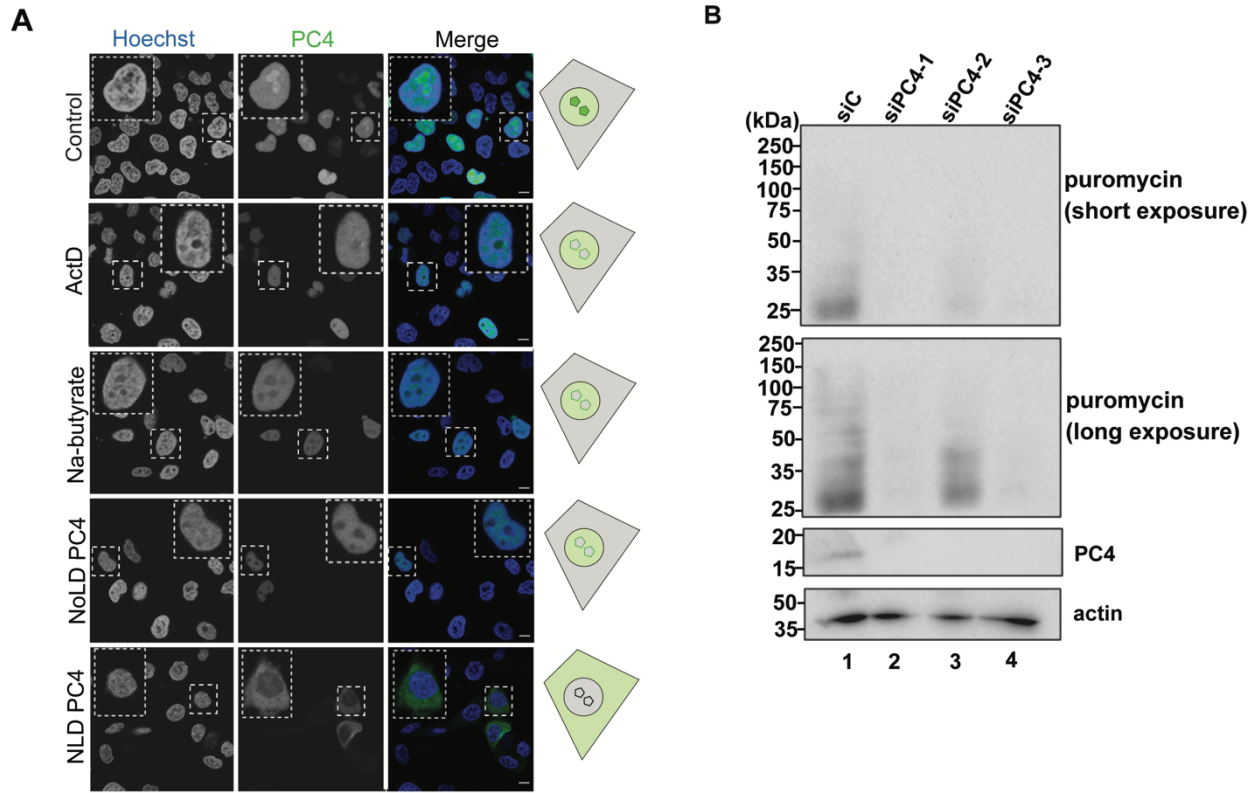

**Figure S3: Loss of nucleolar PC4 leads to abrogation of protein synthesis.** A. Sub-cellular localization of WT PC4 and the PC4 localization mutants (nucleolar localization defective mutant (NoLD), and nuclear localization defective mutant (NLD)). PC4 tagged with GFP and DNA were stained green and blue respectively in the merged images. Scale bar = 10  $\mu$ m. N=3. Scale bar = 10  $\mu$ m. B. Western blotting analysis of puromycin labelling assay performed on HeLa cells following siRNA knockdown of PC4. siRNA against a scrambled sequence was used a control. N=2.

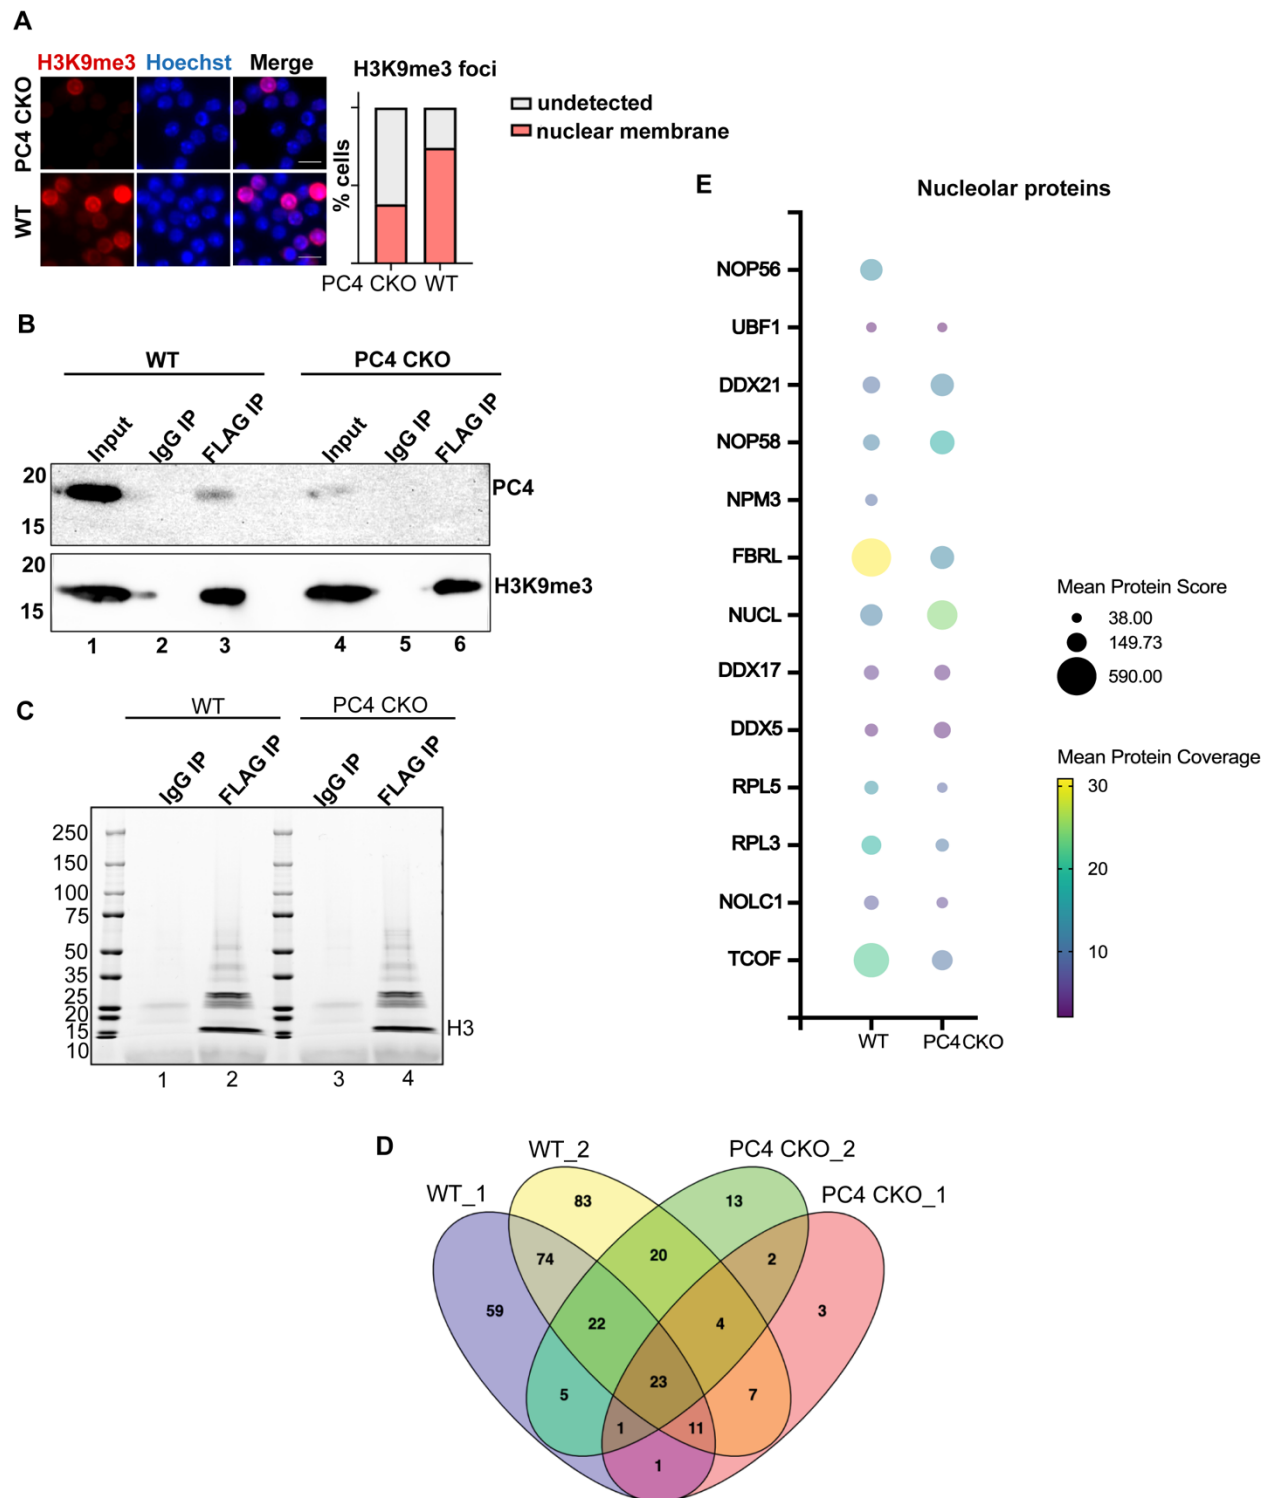

**Figure S4. Loss of H3K9me3 foci in PC4 cKO B cells.** A. Immunofluorescence showing H3K9me3 foci (red) in WT and PC4 cKO B cells. The nuclei were counterstained with Hoechst (blue). B. Western blotting analysis of H3K9me3 IP in WT and PC4 cKO B cells. C. Protein profile of the H3K9me3 IP in WT and cKO B cells. D. Venn diagram

representing the proteins identified in the H3K9me3 IP. E. Graphical representation of the mean protein score and protein coverage of nucleolar proteins present in the H3K9me3 IP from WT and PC4 cKO B cells. Data from N=3 independent biological repeats.

**Uncropped blots and gel Figure 3**

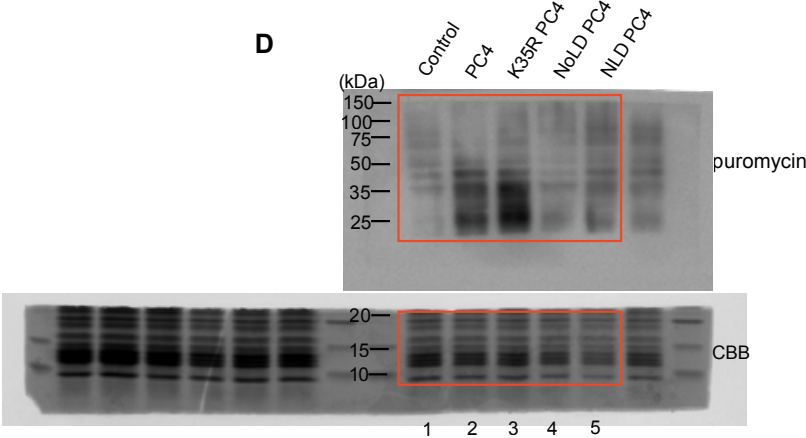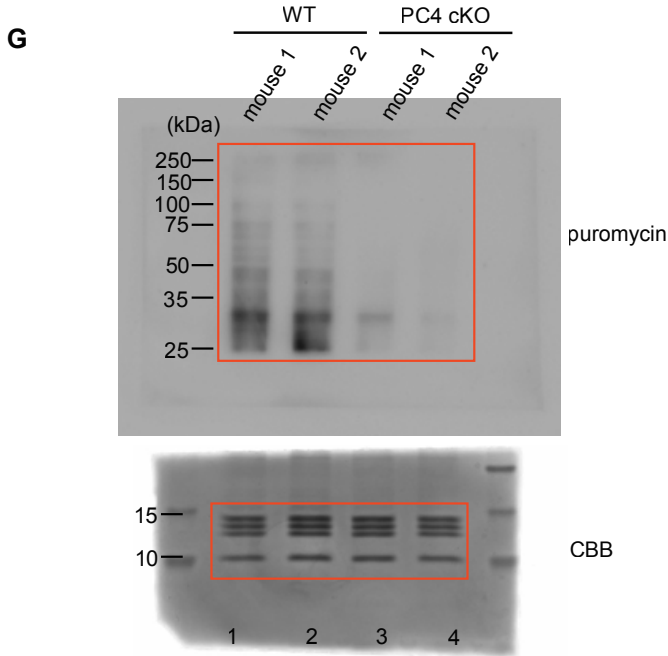

Uncropped blots Figure S3

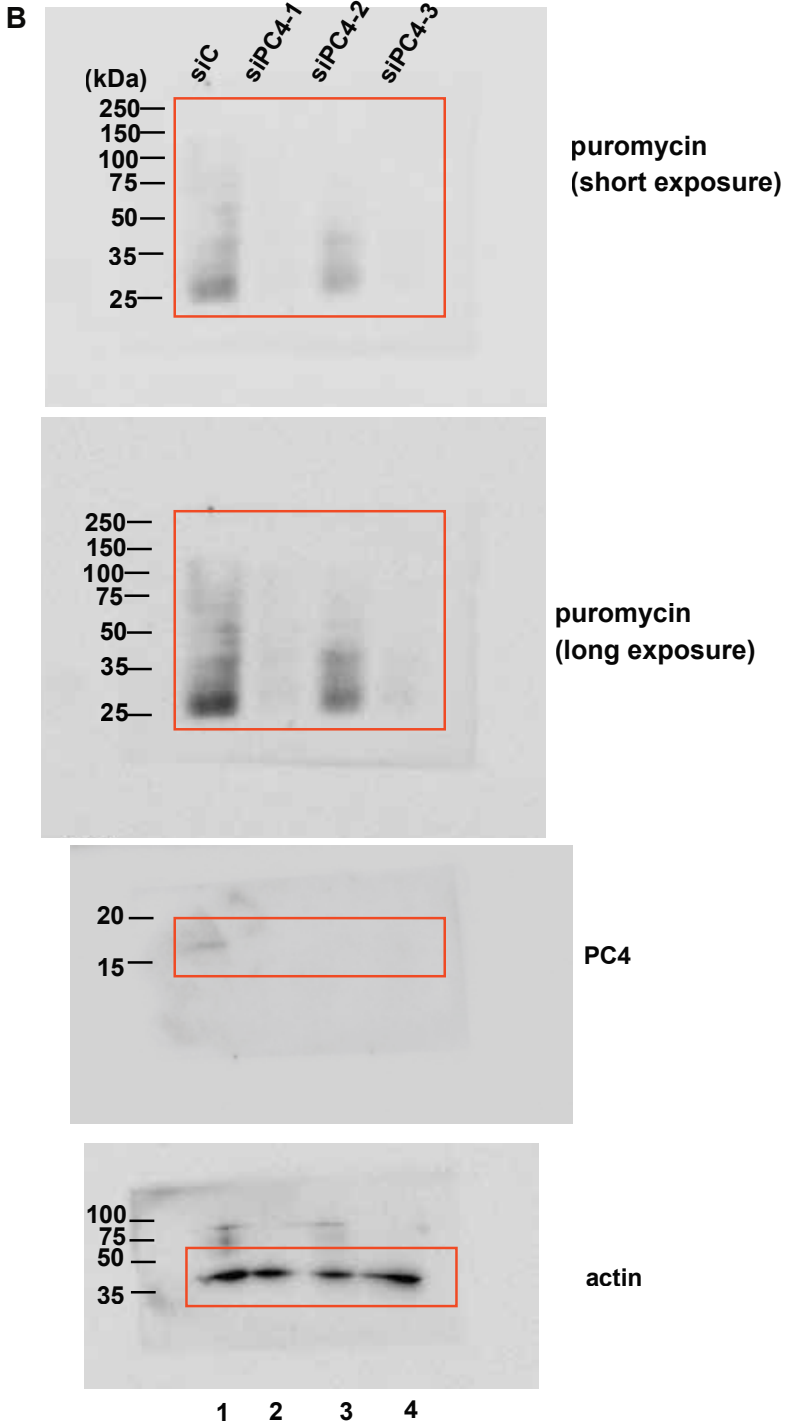

Uncropped blots and gel Figure S4

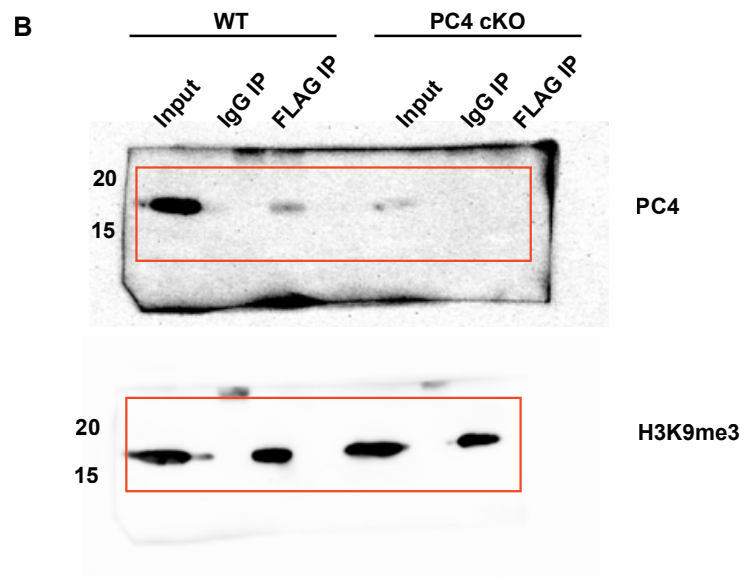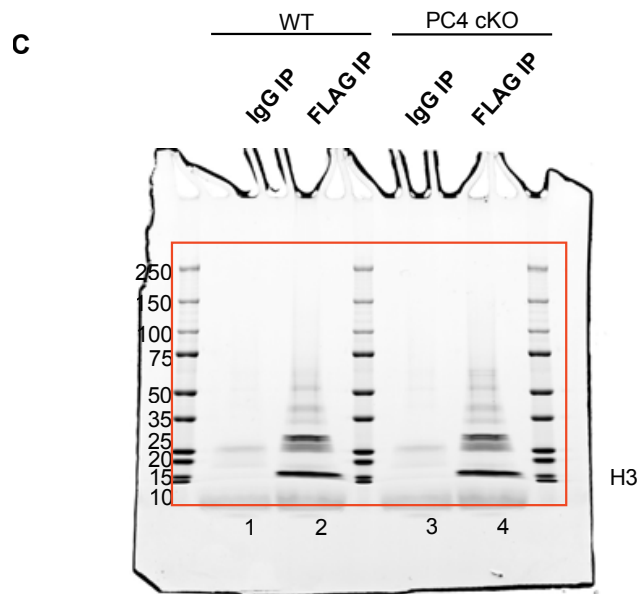

Supplement: Supplementary file 1 [file 9d95d381941f715499b97c8c.pdf]
